# Supplementary material for: Highly conductive PEDOT:PSS film made with ethylene-glycol addition and heated-stir treatment for enhanced photovoltaic performances
Source: Royal Society of Chemistry journal article supplement (doi:10.1039/d0qm00529k), 2020-01-01
Supplement: d0qm00529k1.pdf [file d0qm00529k1.pdf]

## Electronic Supplementary Information

### Highly conductive PEDOT:PSS film made with ethylene-glycol addition and heated-stir treatment for enhanced photovoltaic performances

Ta-Cheng Wei,<sup>a</sup> Shih-Hsiu Chen,<sup>a</sup> and Chia-Yun Chen<sup>\*ab</sup>

<sup>a</sup> Department of Materials Science and Engineering, National Cheng Kung University, No.1 University Road, Tainan 70101, Taiwan

<sup>b</sup> Hierarchical Green-Energy Materials (Hi-GEM) Research Center, National Cheng Kung University, No.1 University Road, Tainan 70101, Taiwan.

S1 Investigations of spin rate and anneal temperature on the film conductivity

Table S1 Examinations of various spin rates on the both film conductivity and FoM value. The results indicated that the optimal spin rate for the coating of treated PEDOT:PSS was 1000 rpm.

| Coating condition<br>( rpm ) | Thickness ( nm ) | Conductivity ( S/cm ) | T( $\lambda$ ) (%) | FoM  |
|------------------------------|------------------|-----------------------|--------------------|------|
| 800                          | 348.7            | 727.9                 | 82.3%              | 46.8 |
| 1000                         | 300.1            | 1228.4                | 84.4%              | 78.5 |
| 1200                         | 284.2            | 801.3                 | 85.2%              | 51.5 |
| 1400                         | 261.8            | 790.3                 | 86.1%              | 50.2 |
| 1600                         | 239.5            | 574.7                 | 86.6%              | 34.8 |
| 2000                         | 192.7            | 563.1                 | 87.8%              | 30.4 |
| 3000                         | 166.8            | 547.4                 | 90.1%              | 32.2 |

Table S2 Examinations of various anneal temperatures on the both film conductivity and FoM value. The results indicated that the optimal window of anneal temperature was in the range of 140<sup>0</sup>C to 180<sup>0</sup>C.

| Annealing condition ( <sup>0</sup> C ) | Thickness ( nm ) | Conductivity ( S/cm ) | T( $\lambda$ ) (%) | FoM  |
|----------------------------------------|------------------|-----------------------|--------------------|------|
| 120                                    | 315.6            | 936.5                 | 84.2%              | 62.0 |
| 140                                    | 304.6            | 1146.7                | 84.6%              | 75.5 |
| 160                                    | 300.1            | 1228.4                | 84.4%              | 78.5 |
| 180                                    | 298.9            | 1126.2                | 84.8%              | 73.8 |
| 200                                    | 303.5            | 903.8                 | 84.7%              | 59.7 |

S2 Photographs for validating the optical transparency of treated films

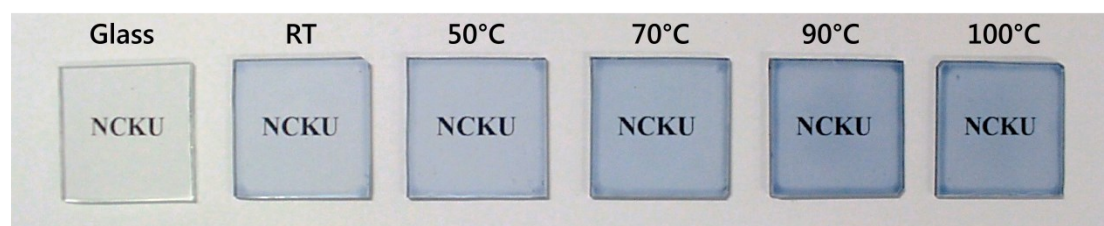

**Figure S1.** Photographs (from left to tight) of bare glass and treated PEDOT:PSS films with stirring temperatures of 25<sup>0</sup>C (room temperature, RT), 50<sup>0</sup>C, 70<sup>0</sup>C, 90<sup>0</sup>C and 100<sup>0</sup>C, respectively.

### S3 Long-term efficiency stability of hybrid solar cells

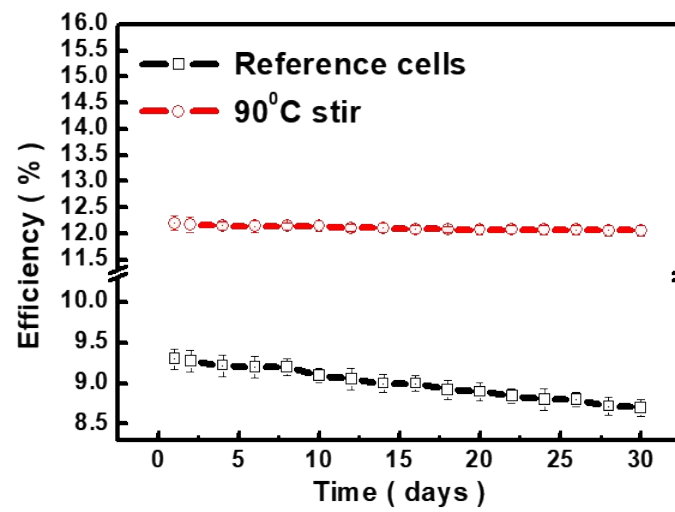

**Figure S2.** Examinations on the long-term efficiency stability of hybrid solar cells.

### S4 Spatial investigations of photon-to-charge conversion

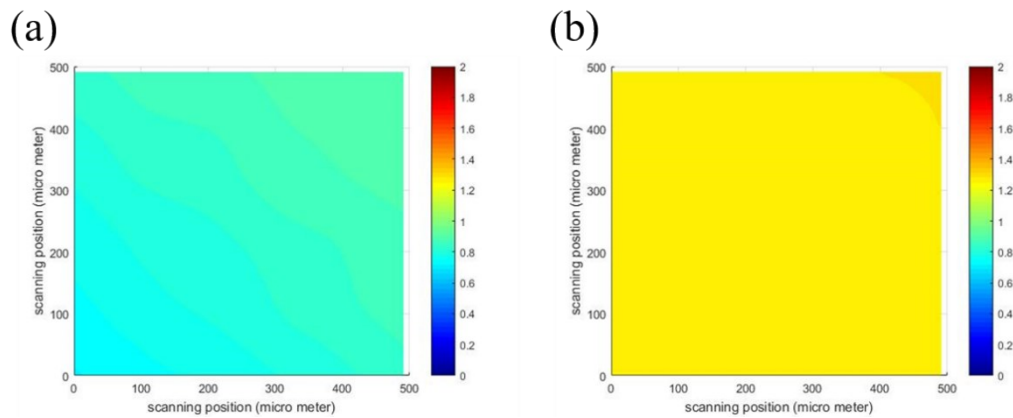

**Figure S3.** Comparisons of photon-to-charge conversion with respect to the spatial position of hybrid solar cells: (a) 25°C-stir treatment and (b) 90°C-stir treatment .
